# Supplementary material
Source: PubMed Central journal article supplement (PMC282841)

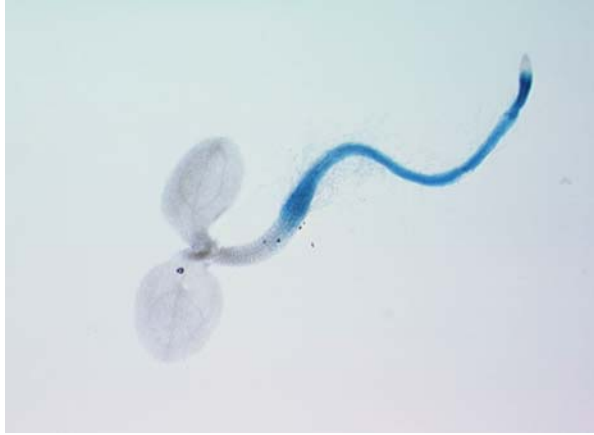

Supplement: plntcell_15_12_2966__1.pdf [file plntcell_15_12_2966__1.pdf]

1 *pks1-1 pks2-1*  
2 *pks1-1*  
3 Col  
4 *pks2-1*

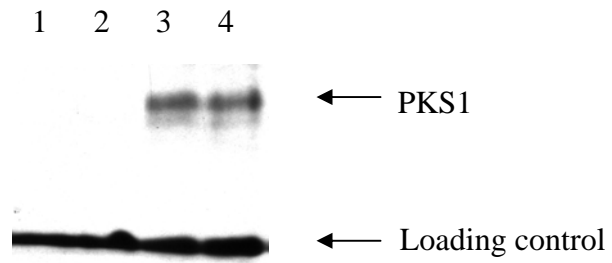

Supplement: plntcell_15_12_2966__2.pdf [file plntcell_15_12_2966__2.pdf]

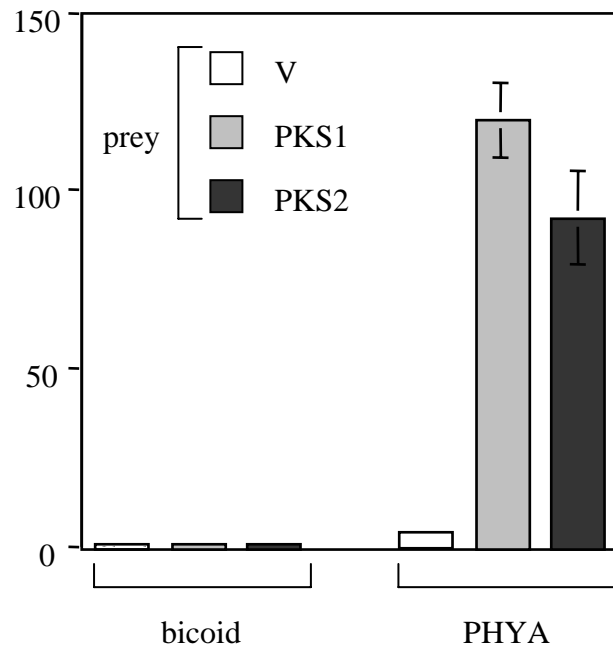

Supplement: plntcell_15_12_2966__3.pdf [file plntcell_15_12_2966__3.pdf]
